# Role of Alveolar $\beta_2$ -Adrenergic Receptors on Lung Fluid Clearance and Exercise Ventilation in Healthy Humans

Stefania Paolillo<sup>1,2</sup>, Riccardo Pellegrino<sup>3</sup>, Elisabetta Salvioni<sup>1</sup>, Mauro Contini<sup>1</sup>, Annamaria Iorio<sup>4</sup>, Francesca Bovis<sup>1</sup>, Andrea Antonelli<sup>3</sup>, Roberto Torchio<sup>5</sup>, Carlo Gulotta<sup>5</sup>, Alessandro Locatelli<sup>6</sup>, Piergiuseppe Agostoni<sup>1,7,8\*</sup>

**1** Centro Cardiologico Monzino, Istituto Di Ricovero e Cura a Carattere Scientifico, Milano, Italy, **2** Dipartimento di Medicina Interna, Scienze cardiovascolari ed immunologiche, Università Federico II, Napoli, Italy, **3** Allergologia e Fisiopatologia Respiratoria, ASO S. Croce e Carle, Cuneo, Italy, **4** Dipartimento cardiovascolare, Ospedali Riuniti e Università di Trieste, Trieste, Italy, **5** Pneumologia-Fisiopatologia Respiratoria, AOU S. Luigi, Orbassano, Torino, Italy, **6** Anestesia cardiocirurgica, ASO S. Croce e Carle, Cuneo, Italy, **7** Dipartimento di Scienze Cliniche e di Comunità, Università di Milano, Milan, Italy, **8** Division of Pulmonary and Critical Care Medicine, Department of Medicine, University of Washington, Seattle, Washington, United States of America

## Abstract

**Background:** In experimental conditions alveolar fluid clearance is controlled by alveolar  $\beta_2$ -adrenergic receptors. We hypothesized that if this occurs in humans, then non-selective  $\beta$ -blockers should reduce the membrane diffusing capacity ( $D_M$ ), an index of lung interstitial fluid homeostasis. Moreover, we wondered whether this effect is potentiated by saline solution infusion, an intervention expected to cause interstitial lung edema. Since fluid retention within the lungs might trigger excessive ventilation during exercise, we also hypothesized that after the  $\beta_2$ -blockade ventilation increased in excess to  $CO_2$  output and this was further enhanced by interstitial edema.

**Methods and Results:** 22 healthy males took part in the study. On day 1, spirometry, lung diffusion for carbon monoxide (DLCO) including its subcomponents  $D_M$  and capillary volume ( $V_{Cap}$ ), and cardiopulmonary exercise test were performed. On day 2, these tests were repeated after rapid 25 ml/kg saline infusion. Then, in random order 11 subjects were assigned to oral treatment with Carvedilol (CARV) and 11 to Bisoprolol (BISOPR). When heart rate fell at least by 10 beats·min<sup>-1</sup>, the tests were repeated before (day 3) and after saline infusion (day 4). CARV but not BISOPR, decreased  $D_M$  ( $-13 \pm 7\%$ ,  $p = 0.001$ ) and increased  $V_{Cap}$  ( $+20 \pm 22\%$ ,  $p = 0.016$ ) and  $VE/CO_2$  slope ( $+12 \pm 8\%$ ,  $p < 0.01$ ). These changes further increased after saline:  $-18 \pm 13\%$  for  $D_M$  ( $p < 0.01$ ),  $+44 \pm 28\%$  for  $V_{Cap}$  ( $p < 0.001$ ), and  $+20 \pm 10\%$  for  $VE/CO_2$  slope ( $p < 0.001$ ).

**Conclusions:** These findings support the hypothesis that in humans *in vivo* the  $\beta_2$ -alveolar receptors contribute to control alveolar fluid clearance and that interstitial lung fluid may trigger exercise hyperventilation.

**Citation:** Paolillo S, Pellegrino R, Salvioni E, Contini M, Iorio A, et al. (2013) Role of Alveolar  $\beta_2$ -Adrenergic Receptors on Lung Fluid Clearance and Exercise Ventilation in Healthy Humans. PLoS ONE 8(4): e61877. doi:10.1371/journal.pone.0061877

**Editor:** Marco Idzko, University Hospital Freiburg, Germany

**Received:** September 5, 2012; **Accepted:** March 14, 2013; **Published:** April 16, 2013

**Copyright:** © 2013 Paolillo et al. This is an open-access article distributed under the terms of the Creative Commons Attribution License, which permits unrestricted use, distribution, and reproduction in any medium, provided the original author and source are credited.

**Funding:** The authors have no funding or support to report.

**Competing Interests:** The authors have declared that no competing interests exist.

\* E-mail: piergiuseppe.agostoni@unimi.it

## Introduction

During acute fluid overload, gas exchange in the lungs is preserved as a result of at least two major mechanisms. First, part of the fluid is accumulated within the interstitial space and around the small airways, thus retarding the formation of alveolar edema [1,2]. Second, fluid permeating the alveolar-capillary membrane is reabsorbed as a result of  $Na^+$  transport systems located on the alveolar surface [3,4] and controlled by the  $\beta_2$  adrenoceptor system [5,6]. The involvement of these receptors has been reported in several animal and *ex-vivo* human lungs studies documenting an increase in alveolar fluid reabsorption upon stimulation of the  $\beta_2$ -alveolar receptors by endogenous and exogenous catecholamine [4,7,8]. Fluid reabsorption from the alveolar and interstitial compartments to the vascular bed has also been invoked to explain the gradual recovery of gas exchange over time at high altitude [9,10].

*In vivo* in humans fluid accumulation within the interstitial lung compartment can be estimated from the changes of lung diffusion capacity for carbon monoxide (DLCO) [11]. The test is the result of two in series resistive components with the first describing the passage of carbon monoxide (CO) through the alveolar-capillary membrane (membrane diffusion,  $D_M$ ), and the latter the combination of the gas with hemoglobin, from which the capillary volume ( $V_{Cap}$ ) can be computed [12]. In heart failure (HF), gradual accumulation of fluid across the lungs leads to a decrease of gas exchange capacity [13] presumably when fluid accumulation in the interstitial space and reabsorption by alveolar  $Na^+$  transport systems are fully exploited. Under these conditions, reduced DLCO and/or  $D_M$  have been consistently reported to be associated to a reduced exercise capacity [13,14], reduced ventilatory efficiency [15] and poor prognosis [16].  $\beta$ -blockers are among the cornerstone tools for HF treatment [17,18] but substantial functional differences have been documented within this class of medications. For instance, in contrast to Bisoprolol

(BISOPR), Carvedilol (CARV) has been shown to reduce DLCO in HF patients [19,20]. This has been interpreted as a result of different mechanisms of these  $\beta$ -blockers on the alveolar  $\beta$ <sub>2</sub>-receptors and therefore on fluid flux across the lung, though this hypothesis has never been proved [21].

This study was conceived to clarify the role of the alveolar  $\beta$ <sub>2</sub>-receptors on reabsorption of lung fluid in humans *in vivo* and see whether interstitial lung edema affects the ventilatory efficiency during exercise. Our first postulate was that by blocking the  $\beta$ <sub>2</sub>-adrenoreceptors with CARV, a non-selective  $\beta$ <sub>1</sub>- $\beta$ <sub>2</sub>-blocker,  $D_M$  decreased as a result of the reduced lung fluid reabsorption. This hypothesis was tested in 11 healthy subjects by measuring the  $D_M$  changes after a short course of oral CARV. Eleven healthy subjects treated with BISOPR, a selective  $\beta$ <sub>1</sub>-blocker, represented the control group. To further explore the role of the alveolar  $\beta$ <sub>2</sub>-receptors in regulating fluid kinetics across the lung interstitium, the experiment was repeated after infusing saline solution, an intervention expected to increase lung fluid within the interstitial lung compartment [22]. Under these conditions we predicted that CARV would be associated with a further decrease in  $D_M$  as a result of the inability of the inactivated  $\beta$ <sub>2</sub>-receptors to clear the fluid out of the alveolar compartment. The second hypothesis that interstitial lung edema contributes to drive minute ventilation (VE) during exercise was tested in the same groups of subjects by examining the changes of the slope of the regression analysis between VE and carbon dioxide production (VCO<sub>2</sub>) as a function of  $D_M$  before and after CARV, BISOPR and saline solution infusion. The prediction was that if interstitial lung edema is a determinant of exercise hyperventilation, then the slope of VE *vs.* VCO<sub>2</sub> should increase with the decrease in  $D_M$ .

## Methods

### Patient population and study protocol

Twenty-two healthy volunteers selected from the medical staff participated in the study. Inclusion criteria were age between 20–60 years, male sex, no smoking history, absence of contraindications to  $\beta$ -blocker therapy, systolic blood pressure at rest ranging from 120 to 140 mmHg, diastolic blood pressure 70–80 mmHg, heart rate (HR) at rest >60 bpm, normal clinical evaluation, history, standard spirometry, echocardiogram and cardiopulmonary exercise test. Among the exclusion criteria were history and/or clinical evidence of any cardiovascular or pulmonary or systemic disorders contraindicating the test or affecting the functional response to exercise, any conditions requiring daily medications, and inability to adequately perform the required maneuvers for pulmonary function tests. The protocol was approved by the local Ethics Committee (Institutional Review Board no. S154/319, date 13/04/2011), and written informed consent was signed prior to the study. The study was registered as EudraCT 2010-020357-14.

### Study protocol

**Pre-study day.** The subjects underwent clinical examination, including blood pressure, HR, and cardio-pulmonary exercise test (CPET) on a cyclo-ergometer for familiarization purposes. If the inclusion/exclusion criteria were met, the subjects were informed of the aim and protocol of the study and requested to sign the consent.

**Study days.** The subjects attended the laboratory on four different occasions whose sequence is shown in Figure 1. On day 1, standard pulmonary function tests, DLCO measurement including its subcomponents  $D_M$  and  $V_{Cap}$ , and CPET were performed. On day 2, the same tests were repeated after infusion of saline solution

at the dose of 25 ml/Kg in less than 30 min. Then, the subjects were randomized to receive either oral CARV (11 subjects) or BISOPR (11 subjects), respectively. In the following days the dose of  $\beta$ -blocker was up-titrated until HR decreased by at least 10 beats·min<sup>-1</sup>. Thereafter, lung function tests, DLCO,  $D_M$ ,  $V_{Cap}$  and CPET were retested before (day 3) and after saline solution infusion (day 4).  $\beta$ -blocker treatment was conducted for at least 5 days to achieve the desired decrease in HR. Study days 1 and 2 and study days 3 and 4 were separated by no more than 48 hours from each other.

### Spirometry and DLCO measurements

Spirometry was performed according to current guidelines with a mass flow-meter (SensorMedics, Yorba Linda, CA) [23]. Predicted values are from Quanjer et al. [24].

DLCO and its subcomponents  $D_M$  and  $V_{Cap}$  were measured with the single-breath method by breathing gas mixtures containing three different O<sub>2</sub> concentrations (21%, 40% and 60%) and 0.3% CO and 0.3% methane (CH<sub>4</sub>) according to Roughton and Forster [12]. DLCO after saline infusion was corrected for a difference of Hb of 0.57 g/dL *vs.* control conditions, a value derived from a previous study conducted with the same amount of saline/Kg [25]. Alveolar volume was estimated from the CH<sub>4</sub> decay slope during constant expiratory flow measurement [26]. Measurements at each mixture were performed at least in duplicate and according to the standard requirements and acceptability criteria of current guidelines [11]. The gas exchange measurements were performed with a V-max 2900 metabolic cart (Sensor Medics, Yorba Linda, CA).

### Cardiopulmonary exercise test

A symptom-limited incremental exercise test was performed on an electronically braked cycle ergometer (Erg 800S, SensorMedics, Yorba Linda, CA). A personalized ramp protocol was designed to achieve maximum load in 10±2 minutes in each subject [27]. The volunteers wore a nose clip and breathed through a mass flow sensor connected to a saliva trap. Ventilation and respiratory gases were measured breath by breath (V-max 2900 metabolic cart, Sensor Medics, Yorba Linda, CA) and then averaged every 20 s for analysis. HR and 12-lead ECG were monitored continuously, hemoglobin saturation was recorded by an ear oxymeter, and blood pressure was monitored with a cuff sphygmomanometer at rest and at peak exercise. Anaerobic threshold (AT) was measured according to standard technique [28]. VE/VCO<sub>2</sub> slope was measured from the beginning of loaded pedaling to the end of the isocapnic buffering period [29].

### Statistical analysis

Data are reported as mean ± SD. Differences between study days or treatment groups were analyzed as percent changes of day 1. The effects of saline infusion were examined by paired Student's *t*-test, whereas the effects of medications with and without saline infusion by unpaired Student's *t*-test. Statistical significance was accepted at *p*<0.05 to reject the null hypothesis. Correlation between variables was assessed by linear regression analysis. The sample size of 11 subjects per group provided a 90% power to detect changes in  $D_M$  by 10 mL·mmHg<sup>-1</sup>·min<sup>-1</sup> and VE/VCO<sub>2</sub> slope by 5 L·min<sup>-1</sup> after CARV and saline infusion with an alpha = 0.05.

Data were stored in an Excel database and then analyzed by SPSS 17.0 (SPSS Inc., Chicago, IL).

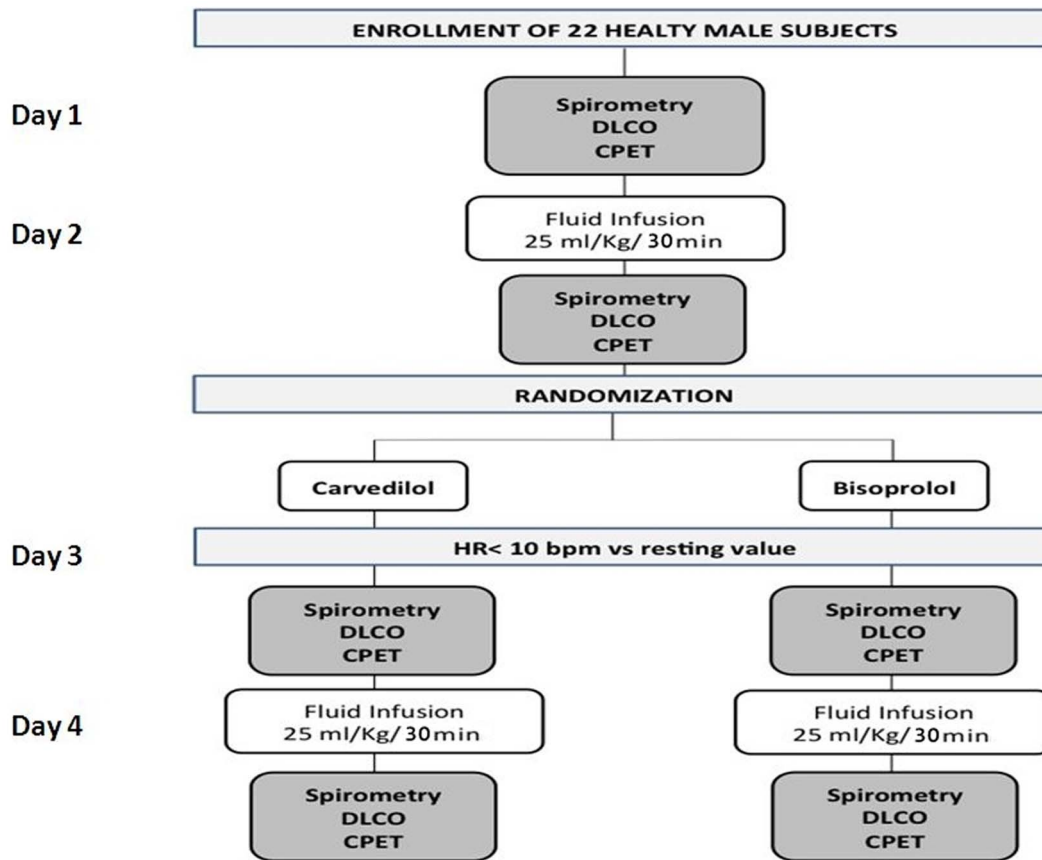

**Figure 1. Design of the study.** Legend: DLCO=Lung diffusion for carbon monoxide; CPET=Cardiopulmonary exercise test; HR=Heart rate. doi:10.1371/journal.pone.0061877.g001

**Results**

The main anthropometric and functional data at rest and peak exercise of day 1 are reported in Table 1.

**Effects of saline infusion (day 2)**

Saline solution infusion was associated with a slight but significant decrease in FVC, FEV<sub>1</sub> and alveolar volume. D<sub>M</sub> and DLCO remained unchanged whereas V<sub>Cap</sub> increased (p=0.006). Exercise capacity was not significantly modified by the intervention. Ventilation efficiency was significantly reduced after saline infusion as documented by the 10±9% increase of the VE/VCO<sub>2</sub> slope (p<0.001). No correlations were found between the changes in VE/VCO<sub>2</sub> and any of the DLCO parameters after saline infusion. The main results are shown in figures 2A and B.

**Effects of β-blockade (day 3)**

Average daily doses of CARV and BISOPR were 25±0 mg and 6.6±2.8 mg, respectively. Both treatments led to similar decrements in resting HR (17±7 and 15±7 beats·min<sup>-1</sup> for CARV and BISOPR, respectively). FEV<sub>1</sub> and FVC slightly but significantly decreased with CARV (p<0.05 and p<0.01, respectively) but not with BISOPR. In contrast, D<sub>M</sub> and V<sub>Cap</sub> exhibited significantly larger changes with CARV (p<0.01 and p<0.05, respectively) than BISOPR. Again, DLCO remained unmodified by any treatments. At peak exercise HR was lower than at day 1 in both groups (p<0.001 for both). The VE/VCO<sub>2</sub> slope significantly increased with CARV compared to BISOPR (p<0.001). None of the other parameters were significantly modified by the β-

**Table 1.** Main anthropometric and functional parameters at rest and peak exercise.

|                                                           |                    |
|-----------------------------------------------------------|--------------------|
| Number of subjects                                        | 22                 |
| Age, years                                                | 40±12              |
| Height, cm                                                | 180±10             |
| BMI, kg·m <sup>-2</sup>                                   | 25.3±3.6           |
| FEV <sub>1</sub> , L (% pred)                             | 4.20±0.60 (107±11) |
| FVC, L (% pred)                                           | 5.10±0.60 (105±11) |
| DLCO, mL·mmHg <sup>-1</sup> ·min <sup>-1</sup> (% pred)   | 31.8±4.7 (97±12)   |
| D <sub>M</sub> , mL·mmHg <sup>-1</sup> ·min <sup>-1</sup> | 57.2±12.3          |
| V <sub>Cap</sub> , mL                                     | 94.4±25.5          |
| VA, L                                                     | 6.4±0.7            |
| Load, watt (% pred)                                       | 206±35 (95±18)     |
| HR max, min <sup>-1</sup> (% pred)                        | 167±13 (96±5)      |
| VO <sub>2</sub> peak, ml·min <sup>-1</sup> (%)            | 33.5±6.4 (90±17)   |
| VE/VCO <sub>2</sub> slope                                 | 23.1±3.1           |

Legend: BMI=Body mass index; FEV<sub>1</sub>=Forced expiratory volume in 1 second; FVC=Forced vital capacity; DLCO=Diffusing lung capacity for carbon monoxide; D<sub>M</sub>=Membrane diffusion; V<sub>Cap</sub>=Capillary volume; VA=Alveolar volume; HR=Heart rate; VO<sub>2</sub>peak=Oxygen uptake at peak exercise; VE/VCO<sub>2</sub> slope=slope of the linear regression analysis of VE plotted vs. VCO<sub>2</sub>. doi:10.1371/journal.pone.0061877.t001

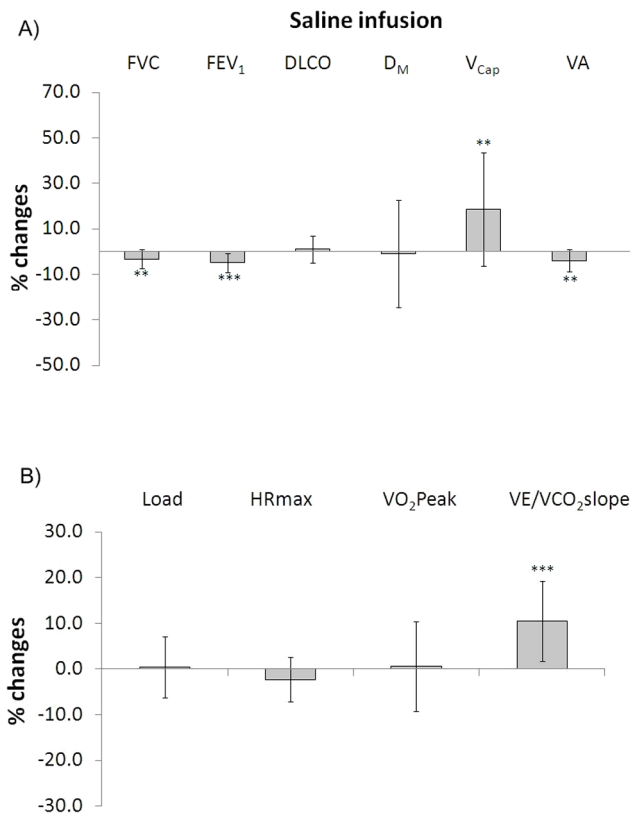

**Figure 2. Changes of the main functional parameters at rest (panel A) and with exercise (panel B) after saline infusion with respect to baseline conditions.** Legend: FVC=Forced vital capacity; FEV<sub>1</sub>=Forced expiratory volume in 1 second; DLCO=Lung diffusion for carbon monoxide; D<sub>M</sub>=Membrane diffusion; V<sub>cap</sub>=Capillary volume; VA=Alveolar volume; HR=Heart rate; VO<sub>2</sub>peak=Oxygen uptake at peak exercise; VE/VCO<sub>2</sub>slope=slope of the linear regression analysis of VE plotted vs. VCO<sub>2</sub> from the beginning of loaded pedaling to the end of the isocapnic buffering period. Statistical differences were examined by paired Student's *t*-test. Symbols denote statistical significance (\*\* = *p*<0.01; \*\*\* = *p*<0.001). doi:10.1371/journal.pone.0061877.g002

blockade. No correlations were observed between the changes in VE/VCO<sub>2</sub> and in DLCO or any of its subcomponents after either β-blocker treatments. The main results are shown in figures 3A and 3B.

#### Effects of saline solution infusion under CARV and BISOPR conditions (day 4)

After either β-blockers, saline infusion caused mild reductions in FEV<sub>1</sub> and FVC. With CARV D<sub>M</sub> and V<sub>cap</sub> were significantly reduced and increased, respectively. Their changes were larger than at day 3 (*p*<0.02 for both). With CARV the increase in V<sub>cap</sub> was larger than with BISOPR (*p*<0.02) (figure 4A). Exercise capacity was preserved with either treatments. However, the VE/VCO<sub>2</sub> slope significantly increased more with CARV than BISOPR (figure 4B) (*p*=0.02). No significant correlations were found between the changes in VE/VCO<sub>2</sub> and in any lung diffusion parameters with CARV.

#### Discussion

The main results of this study are that, compared with BISOPR, CARV was associated with a significant reduction in D<sub>M</sub> and

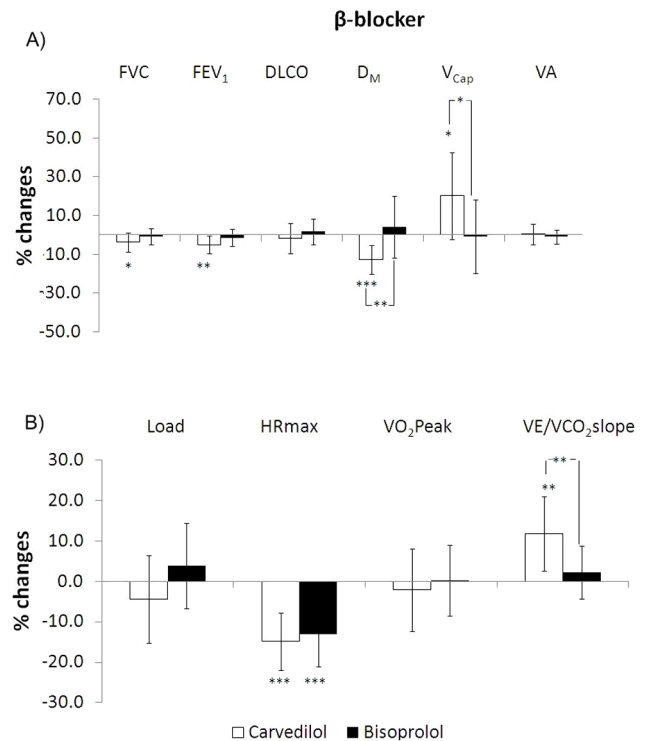

**Figure 3. Changes in the main functional parameters at rest (panel A) and with exercise (panel B) after Carvedilol (empty figures) and Bisoprolol (full figures) with respect to baseline conditions.** Statistical differences were examined by unpaired Student's *t*-test. Legend as in figure 2. Symbols denote statistical significance (\* = *p*<0.05; \*\* = *p*<0.01; \*\*\* = *p*<0.001). doi:10.1371/journal.pone.0061877.g003

increment in V<sub>cap</sub>, that were larger when the test was preceded by saline infusion. As CARV is a non-selective β-blocker, these findings support the hypothesis that alveolar β<sub>2</sub>-adrenergic receptors play a significant role in controlling alveolar fluids reabsorption *in vivo* in humans. In addition, the significant increment in VE/VCO<sub>2</sub> observed with CARV but not with BISOPR either before or after saline solution infusion suggests that interstitial lung edema may contribute to exaggerate the ventilatory response to exercise in humans.

#### Interpretation of results and limits of the study

β<sub>2</sub>-adrenergic receptors are expressed all throughout the lung including the alveolar space where they regulate several key proteins needed for ion and fluid transport. This has been documented in rat and sheep alveolar epithelial cells as well as in human lung cells [30]. Even though also the alveolar β<sub>1</sub>-adrenergic receptors can accelerate alveolar active sodium transport [31], data on alveolar β<sub>2</sub>-adrenergic receptors knockout mice suggest that it is the β<sub>2</sub> receptors that are responsible for the most of the β-receptor mediated fluid reabsorption [32]. No data are available *in vivo* in humans.

To test the hypothesis that alveolar β<sub>2</sub>-adrenergic receptors contribute to regulate fluid homeostasis within the alveolar compartment in humans *in vivo* we examined the changes in D<sub>M</sub>, a very sensitive marker of fluid accumulation within the interstitial lung compartment, after blocking the alveolar adrenergic receptors and over-hydrating the lung. With the latter intervention, V<sub>cap</sub> increased presumably as a result of the recruitment or over-distension of the pulmonary capillaries. This

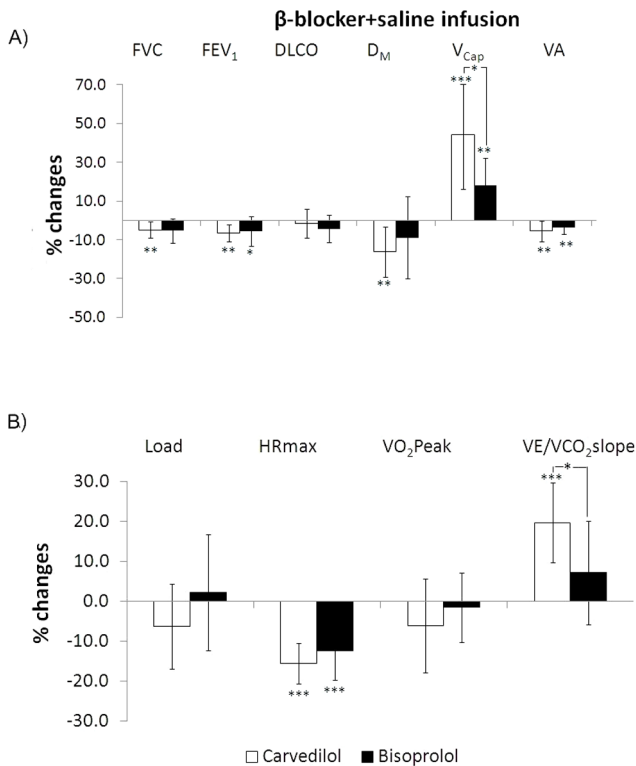

**Figure 4. Changes in the main functional parameters at rest (panel A) and with exercise (panel B) after saline infusion under Carvedilol (empty figures) and Bisoprolol (full figures) conditions with respect to baseline conditions.** Statistical differences were examined by unpaired Student’s *t*-test. Legend as in figure 2. Symbols denote statistical significance (\* = *p* < 0.05; \*\* = < 0.01; \*\*\* = *p* < 0.001). doi:10.1371/journal.pone.0061877.g004

was associated with a decrease in *D<sub>M</sub>* consistent with fluid accumulating also along the alveolar capillary membrane and presumably within the space around the small airways. DLCO did not change as a result of the opposite changes in *D<sub>M</sub>* and *V<sub>Cap</sub>* that compensated each other. A very mild restrictive pattern also occurred, as suggested by the decrease in FEV<sub>1</sub> and FVC. These data are in line with previous reports, where infusion of a similar amount of saline had similar effects in lung function [33,34,35,36] and DLCO [6,25,37].

With CARV, *D<sub>M</sub>* significantly decreased, presumably because the β<sub>2</sub>-blockade was such that the active pumps located on the alveolar surface and necessary to pump fluid out of the alveolar compartment were down-regulated. However, the increase in *V<sub>Cap</sub>* was quite a surprising finding and difficult to explain. Because β-blockers are not known to increase cardiac output in healthy subjects, we postulate that the increase in *V<sub>Cap</sub>* could have been the result of some local feed-back control to maintain constant gas exchange counterbalancing *D<sub>M</sub>* reduction [13]. Can these data support the hypothesis that the alveolar β<sub>2</sub>-receptors *in vivo* in humans contribute to keep fluid homeostasis across the alveolar-interstitial membrane? We believe this is the case for the following reasons. First, *D<sub>M</sub>* is a very sensitive functional index of the alveolar-capillary membrane as it estimates the CO gradient between the two compartments [12], and as such, is a reflection of the interstitium morphology [13]. As there were no other reasons for *D<sub>M</sub>* to decrease in our study, these findings strongly suggest that blocking the alveolar β<sub>2</sub>-adrenergic receptors with CARV

allowed some fluid to be accumulated within the lung interstitium. Second, in animals models, infusion of saline solution was associated with interstitial and airway wall edema [1], and in HF infusion of even small amount of saline was associated with gas exchange worsening [37,38]. What our study documents is that pharmacological inhibition of the β<sub>2</sub>-receptors led to functional findings very similar to saline infusion at the level of the alveolar-capillary membrane. Given the bulk of evidence that alveolar β<sub>2</sub>-receptors regulate fluid clearance through the active Na<sup>+</sup> channels at least *in vitro* [3,5], the decrease in *D<sub>M</sub>* after CARV lends support for the first time to the hypothesis that the alveolar β<sub>2</sub>-receptors control the fluid homeostasis *in vivo* in humans across the alveolar-capillary membrane.

In animals, induced pulmonary vascular congestion stimulates the pulmonary C-fibers [39,40] that in turn trigger rapid shallow breathing [41]. Studies in HF patients [15] and in healthy subjects before and after saline infusion documented an excess of ventilation with respect to the CO<sub>2</sub> produced during exercise [25], suggesting that interstitial lung edema could contribute to cause hyperventilation during exercise. At a first glance, our findings appear to negate this hypothesis as no correlations were observed between the increase in VE/VCO<sub>2</sub> slope and decrease in *D<sub>M</sub>*. Yet despite the lack of this kind of evidence we believe that the idea that interstitial lung edema can trigger exercise hyperventilation is still true for a series of reasons. First, the increase of the VE/VCO<sub>2</sub> slope was always coincident with the decrease of *D<sub>M</sub>* no matter how the latter was achieved with saline solution infusion, CARV, or both. When BISOPR was given instead of CARV, *D<sub>M</sub>* remained unmodified by treatment, and so did the VE/VCO<sub>2</sub> slope. Second, when the changes in VE/VCO<sub>2</sub> were plotted against the changes in *D<sub>M</sub>* on all study days, a clear relationship became apparent (figure 5), suggesting that VE increased in excess to the VCO<sub>2</sub> when *D<sub>M</sub>* was reduced. If this reinforces our original hypothesis that interstitial lung edema significantly contributes to reduce the ventilator efficiency during physical exercise, this does not deny that other mechanisms regulate ventilation during exercise especially in disease. For instance, in chronic HF, CARV, as opposed to BISOPR and the present findings in healthy humans, has been shown to reduce the VE/VCO<sub>2</sub> slope [39] presumably because of its effects on the overactivated chemoreflex. Therefore, we acknowledge the overly simplicity of our model with respect to HF, a disorder where much of exercise hyperventilation is sustained not only by interstitial lung edema but also altered autonomic reflex control, lung vascular pathology and functional dysfunction, physical deconditioning, early occurrence of metabolic acidosis with exercise, and neural afferent signals from exercising muscles and systemic circulation [42,43,44]. As a second limit of the study, we also concede that a random cross-over design of the study could have provided more solid evidence about the effects of CARV on the alveolar β<sub>2</sub>-receptors blockade with respect to BISOPR. Yet, in designing the trial we considered this at a higher risk of drop-out than the double-blind random design because of the excessive burden of invasive tests and treatment for the participants.

**Clinical implications**

HF is a complex disease where fluid accumulation within the interstitial space and exercise hyperventilation are the only two features reproduced in our model. Yet, our findings may offer important considerations for the clinical approach to the disease.

If interstitial lung edema is a key issue of the disease and presumably plays a substantial role to reduce the ventilatory efficiency during exercise, then it is wondered what is the best functional index for clinical follow-up. The decrease of FEV<sub>1</sub> and

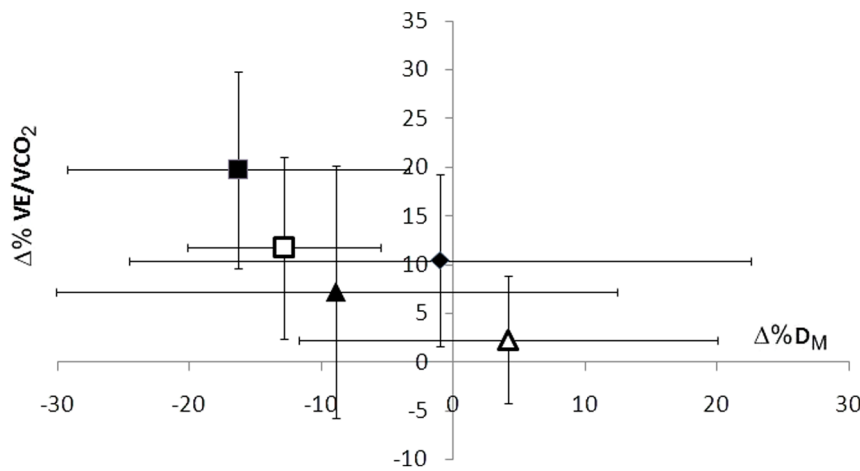

**Figure 5. Mean changes in VE/VCO<sub>2</sub> slope vs. D<sub>M</sub> caused by saline infusion alone (diamond), Bisoprolol (empty triangle), Carvedilol (empty square) and saline infusion with Bisoprolol (full triangle) and Carvedilol (full square).**  
doi:10.1371/journal.pone.0061877.g005

FVC with CARV was significant from a statistical point of view but quite small and on average well within the limits of natural variability of the measurements over time [23], thus limiting their use in routine practice. DLCO appears to be a quite insensitive parameter to examine the perturbations of gas exchange with β-blockers and fluid accumulation within the lung interstitium. This is because the changes in its subcomponents tend to compensate each other, thus leaving DLCO unchanged. Measuring D<sub>M</sub> appears to be a realistic alternative as it directly estimates the morphological changes at the alveolar-capillary membrane level. It remains to demonstrate the impact of such a functional test in clinical practice.

As a corollary, our data also suggest that non-selective β-blockers are not indicated in the presence of clinical and/or radiological signs of fluid accumulation within the lung.

### Conclusions

The present study shows that in healthy subjects CARV, a non-selective β<sub>1</sub> and β<sub>2</sub> blocker, was significantly associated with a

decrease in D<sub>M</sub>, especially after saline infusion. As this finding was not replicated with BISOPR, a selective β<sub>1</sub> blocker, we speculate that the decrease in D<sub>M</sub> was the result of a blockade of the alveolar β<sub>2</sub>-adrenergic receptors known to control the active Na<sup>+</sup> transport of fluid out the alveolar and interstitial lung compartments. The decrease in D<sub>M</sub> was associated with an increase in the VE vs. VCO<sub>2</sub> slope during exercise, thus suggesting that fluid accumulation within the interstitial lung compartment may contribute to trigger hyperventilation during exercise, thus reducing the ventilator efficiency. These findings may represent the basis for a more physiologically oriented β-blocker use in HF.

### Author Contributions

Conceived and designed the experiments: PA RP SP MC. Performed the experiments: PA RP SP MC AIAA RT CG AL. Analyzed the data: FB ES PA RP. Wrote the paper: PA RP SP.

### References

1. Staub NC (1974) Pulmonary edema. *Physiol Rev* 54: 678–811.
2. Staub NC, Nagano H, Pearce ML (1967) Pulmonary edema in dogs, especially the sequence of fluid accumulation in lungs. *J Appl Physiol* 22: 227–240.
3. Mutlu GM, Sznajder JI (2005) Mechanisms of pulmonary edema clearance. *Am J Physiol Lung Cell Mol Physiol* 289: L685–695.
4. Matthay MA, Folkesson HG, Clerici C (2002) Lung epithelial fluid transport and the resolution of pulmonary edema. *Physiol Rev* 82: 569–600.
5. Mutlu GM, Koch WJ, Factor P (2004) Alveolar epithelial beta 2-adrenergic receptors: their role in regulation of alveolar active sodium transport. *Am J Respir Crit Care Med* 170: 1270–1275.
6. Snyder EM, Beck KC, Turner ST, Hoffman EA, Joyner MJ, et al. (2007) Genetic variation of the beta2-adrenergic receptor is associated with differences in lung fluid accumulation in humans. *J Appl Physiol* 102: 2172–2178.
7. Sakuma T, Folkesson HG, Suzuki S, Okaniwa G, Fujimura S, et al. (1997) Beta-adrenergic agonist stimulated alveolar fluid clearance in ex vivo human and rat lungs. *Am J Respir Crit Care Med* 155: 506–512.
8. Sakuma T, Okaniwa G, Nakada T, Nishimura T, Fujimura S, et al. (1994) Alveolar fluid clearance in the resected human lung. *Am J Respir Crit Care Med* 150: 305–310.
9. Agostoni P, Caldara G, Bussotti M, Revera M, Valentini M, et al. (2010) Continuous positive airway pressure increases haemoglobin O<sub>2</sub> saturation after acute but not prolonged altitude exposure. *Eur Heart J* 31: 457–463.
10. Agostoni P, Swenson ER, Bussotti M, Revera M, Meriggi P, et al. (2011) High-altitude exposure of three weeks duration increases lung diffusing capacity in humans. *J Appl Physiol* 110: 1564–1571.
11. Macintyre N, Crapo RO, Viegi G, Johnson DC, van der Grinten CP, et al. (2005) Standardisation of the single-breath determination of carbon monoxide uptake in the lung. *Eur Respir J* 26: 720–735.
12. Roughton FJ, Forster RE (1957) Relative importance of diffusion and chemical reaction rates in determining rate of exchange of gases in the human lung, with special reference to true diffusing capacity of pulmonary membrane and volume of blood in the lung capillaries. *J Appl Physiol* 11: 290–302.
13. Puri S, Baker BL, Dutka DP, Oakley CM, Hughes JM, et al. (1995) Reduced alveolar-capillary membrane diffusing capacity in chronic heart failure. Its pathophysiological relevance and relationship to exercise performance. *Circulation* 91: 2769–2774.
14. Agostoni P, Bussotti M, Cattadori G, Margutti E, Contini M, et al. (2006) Gas diffusion and alveolar-capillary unit in chronic heart failure. *Eur Heart J* 27: 2538–2543.
15. Guazzi M, Reina G, Tumminello G, Guazzi MD (2005) Alveolar-capillary membrane conductance is the best pulmonary function correlate of exercise ventilation efficiency in heart failure patients. *Eur J Heart Fail* 7: 1017–1022.
16. Guazzi M, Pontone G, Brambilla R, Agostoni P, Reina G (2002) Alveolar-capillary membrane gas conductance: a novel prognostic indicator in chronic heart failure. *Eur Heart J* 23: 467–476.
17. Dickstein K, Cohen-Solal A, Filippatos G, McMurray JJ, Ponikowski P, et al. (2008) ESC Guidelines for the diagnosis and treatment of acute and chronic heart failure 2008: the Task Force for the Diagnosis and Treatment of Acute and Chronic Heart Failure 2008 of the European Society of Cardiology. Developed in collaboration with the Heart Failure Association of the ESC (HFA) and endorsed by the European Society of Intensive Care Medicine (ESICM). *Eur Heart J* 29: 2388–2442.

18. Lopez-Sendon J, Swedberg K, McMurray J, Tamargo J, Maggioni AP, et al. (2004) Expert consensus document on beta-adrenergic receptor blockers. *Eur Heart J* 25: 1341–1362.
19. Agostoni P, Guazzi M, Bussotti M, De Vita S, Palermo P (2002) Carvedilol reduces the inappropriate increase of ventilation during exercise in heart failure patients. *Chest* 122: 2062–2067.
20. Agostoni P, Contini M, Cattadori G, Apostolo A, Sciomer S, et al. (2007) Lung function with carvedilol and bisoprolol in chronic heart failure: is beta selectivity relevant? *Eur J Heart Fail* 9: 827–833.
21. Agostoni P, Palermo P, Contini M (2009) Respiratory effects of beta-blocker therapy in heart failure. *Cardiovasc Drugs Ther* 23: 377–384.
22. Wetzel RC, Herold CJ, Zerhouni EA, Robotham JL (1993) Intravascular volume loading reversibly decreases airway cross-sectional area. *Chest* 103: 865–870.
23. Miller MR, Hankinson J, Brusasco V, Burgos F, Casaburi R, et al. (2005) Standardisation of spirometry. *Eur Respir J* 26: 319–338.
24. Quanjer PH, Tammeling GJ, Cotes JE, Pedersen OF, Peslin R, et al. (1993) Lung volumes and forced ventilatory flows. Report Working Party Standardization of Lung Function Tests, European Community for Steel and Coal. Official Statement of the European Respiratory Society. *Eur Respir J Suppl* 16: 5–40.
25. Robertson HT, Pellegrino R, Pini D, Oreglia J, DeVita S, et al. (2004) Exercise response after rapid intravenous infusion of saline in healthy humans. *J Appl Physiol* 97: 697–703.
26. Ramage JE, Jr., Coleman RE, MacIntyre NR (1987) Rest and exercise cardiac output and diffusing capacity assessed by a single slow exhalation of methane, acetylene, and carbon monoxide. *Chest* 92: 44–50.
27. Agostoni P, Bianchi M, Moraschi A, Palermo P, Cattadori G, et al. (2005) Work-rate affects cardiopulmonary exercise test results in heart failure. *Eur J Heart Fail* 7: 498–504.
28. Beaver WL, Wasserman K, Whipp BJ (1986) A new method for detecting anaerobic threshold by gas exchange. *J Appl Physiol* 60: 2020–2027.
29. Whipp BJ, Davis JA, Wasserman K (1989) Ventilatory control of the 'isocapnic buffering' region in rapidly-incremental exercise. *Respir Physiol* 76: 357–367.
30. Mutlu GM, Factor P (2008) Alveolar epithelial beta2-adrenergic receptors. *Am J Respir Cell Mol Biol* 38: 127–134.
31. Sakuma T, Tsuchihara C, Ishigaki M, Osanai K, Nambu Y, et al. (2001) Denopamine, a beta(1)-adrenergic agonist, increases alveolar fluid clearance in ex vivo rat and guinea pig lungs. *J Appl Physiol* 90: 10–16.
32. Mutlu GM, Dumasius V, Burhop J, McShane PJ, Meng FJ, et al. (2004) Upregulation of alveolar epithelial active Na<sup>+</sup> transport is dependent on beta2-adrenergic receptor signaling. *Circ Res* 94: 1091–1100.
33. Pellegrino R, Dellaca R, Macklem PT, Aliverti A, Bertini S, et al. (2003) Effects of intravenous infusion on lung mechanics and airway responsiveness in humans. *J Appl Physiol* 95: 728–734.
34. Coates G, Powles AC, Morrison SC, Sutton JR, Webber CE, et al. (1983) The effects of intravenous infusion of saline on lung density, lung volumes, nitrogen washout, computed tomographic scans, and chest radiographs in humans. *Am Rev Respir Dis* 127: 91–96.
35. Farney RJ, Morris AH, Gardner RM, Armstrong JD, Jr. (1977) Rebreathing pulmonary capillary and tissue volume in normals after saline infusion. *J Appl Physiol* 43: 246–253.
36. Muir AL, Flenley DC, Kirby BJ, Sudlow MF, Guyatt AR, et al. (1975) Cardiorespiratory effects of rapid saline infusion in normal man. *J Appl Physiol* 38: 786–775.
37. Guazzi M, Agostoni P, Bussotti M, Guazzi MD (1999) Impeded alveolar-capillary gas transfer with saline infusion in heart failure. *Hypertension* 34: 1202–1207.
38. Puri S, Dutka DP, Baker BL, Hughes JM, Cleland JG (1999) Acute saline infusion reduces alveolar-capillary membrane conductance and increases airflow obstruction in patients with left ventricular dysfunction. *Circulation* 99: 1190–1196.
39. Coleridge HM, Coleridge JC (1977) Afferent vagal C-fibers in the dog lung: their discharge during spontaneous breathing and their stimulation by alloxan and pulmonary congestion. In: Paintal AS, Gill-Kumar P, editors. *Krogh Centenary Symposium on Respiratory Adaptation*. Delhi: Vallabhbhai Patel Chest Inst. pp. 393–406.
40. Paintal AS (1969) Mechanism of stimulation of type J pulmonary receptors. *J Physiol* 203: 511–532.
41. Coleridge JC, Coleridge HM (1984) Afferent vagal C fibre innervation of the lungs and airways and its functional significance. *Rev Physiol Biochem Pharmacol* 99: 1–110.
42. Piepoli MF, Kaczmarek A, Francis DP, Davies LC, Rauchhaus M, et al. (2006) Reduced peripheral skeletal muscle mass and abnormal reflex physiology in chronic heart failure. *Circulation* 114: 126–134.
43. Wasserman K, Zhang YY, Gitt A, Belardinelli R, Koike A, et al. (1997) Lung function and exercise gas exchange in chronic heart failure. *Circulation* 96: 2221–2227.
44. Sue DY (2011) Excess ventilation during exercise and prognosis in chronic heart failure. *Am J Respir Crit Care Med* 183: 1302–1310.
